# Supplementary material for: SET8 prevents excessive DNA methylation by methylation-mediated degradation of UHRF1 and DNMT1
Source: PubMed Central journal article supplement — Nucleic Acids Res. 2019 Aug 10;47(17):9053–68. doi: 10.1093/nar/gkz626 (PMC6753495; doi:10.1093/nar/gkz626), 2019-08-10
Supplement: gkz626_supplemental_file.pdf [file gkz626_supplemental_file.pdf]

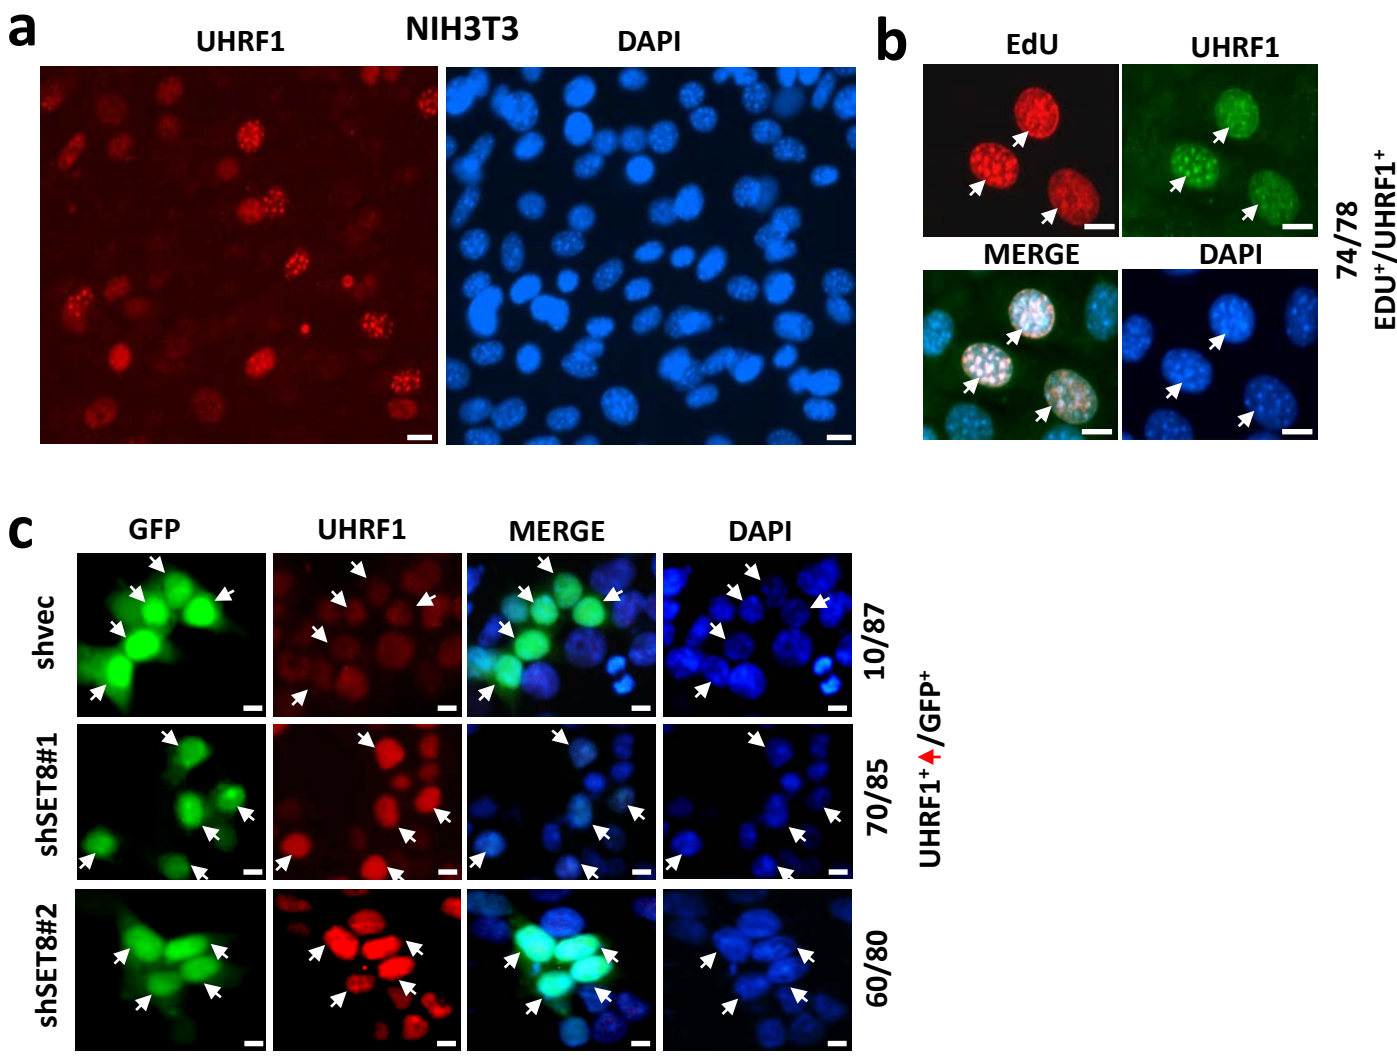

**Supplementary Figure S1. In NIH3T3 cells the UHRF1 protein is highly expressed in S phase of cell cycle.**  
**a)** Immunostaining showing a highly variable level of UHRF1 protein in unsynchronized NIH3T3 cells. Scale bar, 20  $\mu$ m. **b)** The high UHRF1-expressing NIH3T3 cells were also EdU labeled in S phase. NIH3T3 cells were cultured in the presence of EdU for 2hs before processed for fluorescent imaging of EdU by a click chemistry reaction and UHRF1 by immunostaining. Scale bar, 20  $\mu$ m. **c)** Immunostaining showing that knockdown of SET8 by transient transfection of SET8-specific shRNAs (green) resulted in an elevated level of UHRF1 (red) protein in HeLa cells. Scale bar, 20  $\mu$ m.

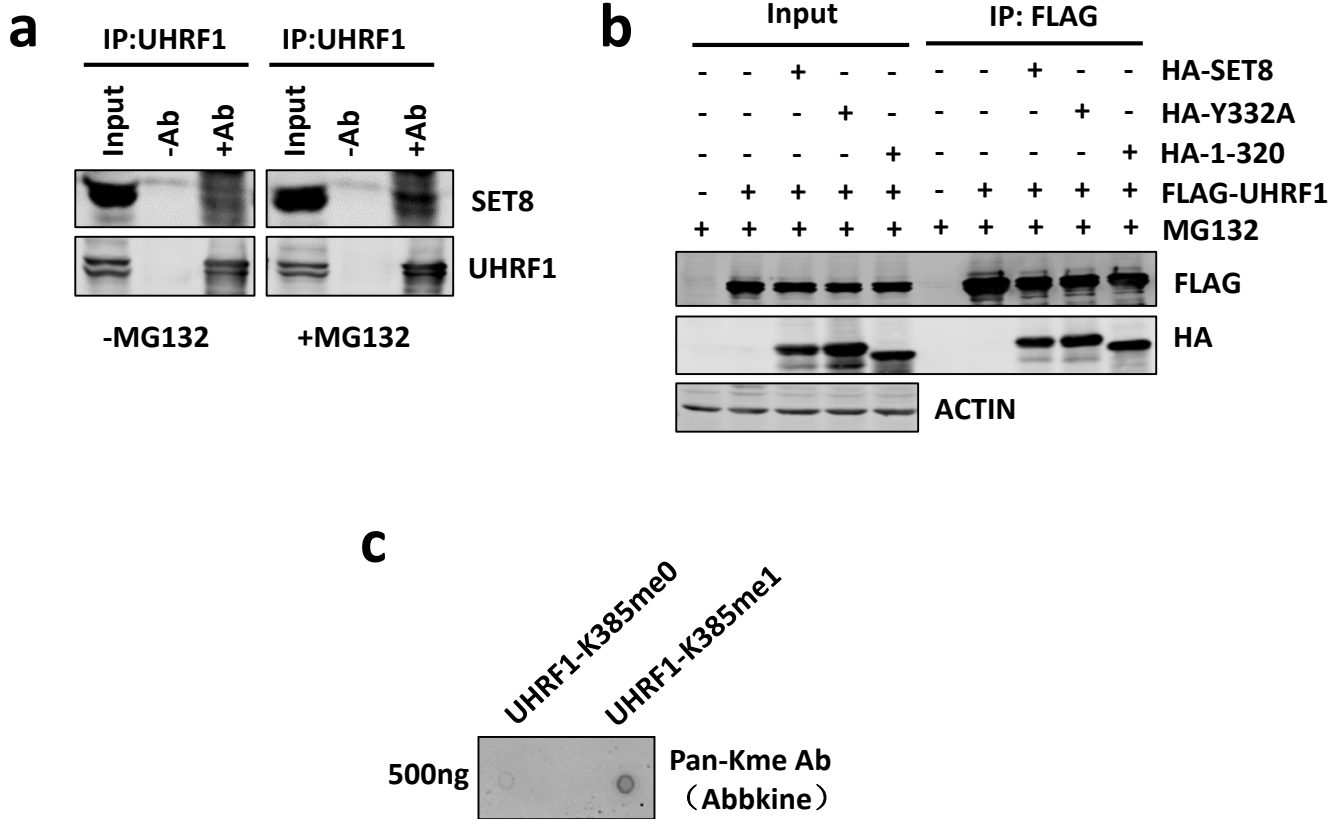

**Supplementary Figure S2. SET8 interacts with UHRF1 in co-IP assay.** **a)** Analysis of endogenous UHRF1 and SET8 interaction by co-IP. HEK293T cells were cultured with or without addition of MG132 for 8 hours before harvested for preparation of nuclear extracts. The resulting nuclear extracts were used for IP-Western Blot analysis using antibodies as indicated. **b)** IP-Western blot analysis for the interaction between ectopically expressed UHRF1 and SET8 or SET8 mutants as indicated. **c)** Dot blot assay for validation of Pan-Kme antibody. 500 ng of synthetic control and K385me1 peptides were spotted onto nitrocellulose membrane and blotted with a Pan-Kme antibody purchased from Abbkine.

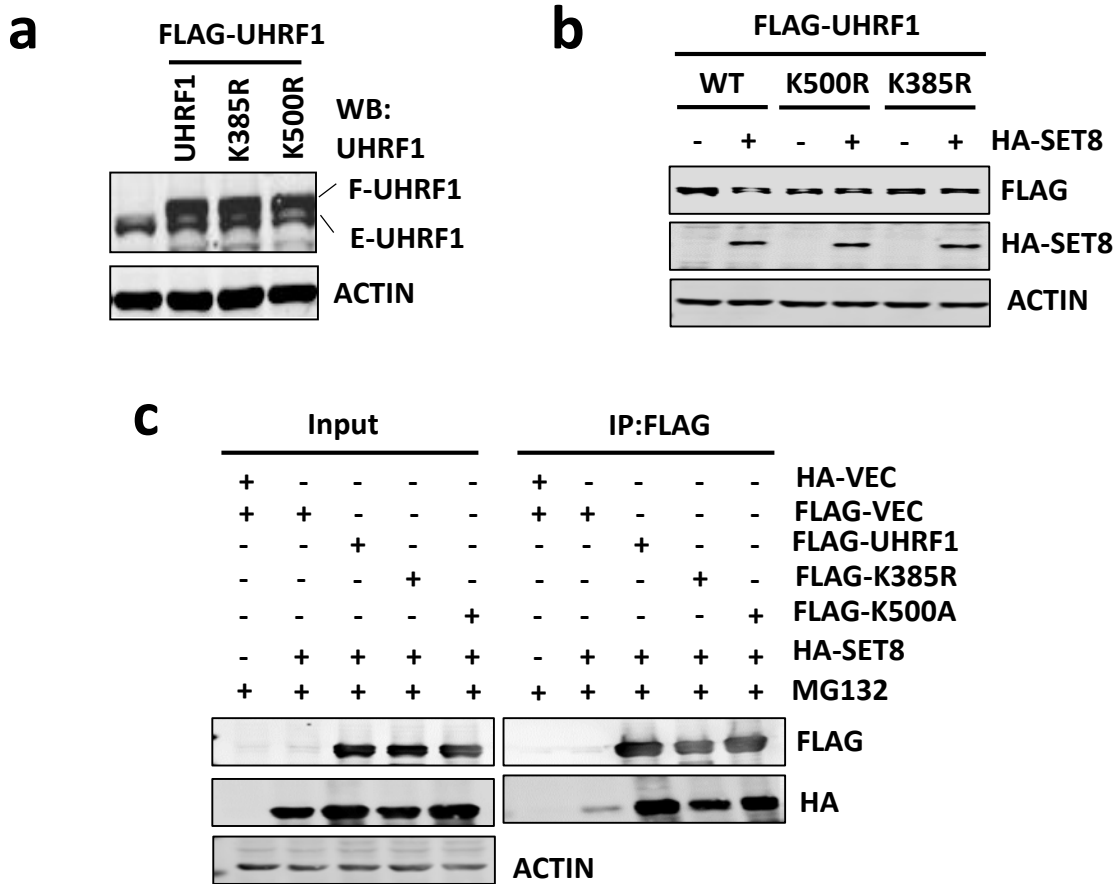

**Supplementary Figure S3. Characterization of UHRF1 K385R and K500R mutants.** **a)** Western blot analysis of cellular extracts derived from control and FLAG-UHRF1 or mutant UHRF1-expressing stable cell lines. The stable cell lines were established by transfection of HeLa cells with pPYCAGIP-based UHRF1-expressing plasmids and selected with puromycin. **b)** Western blot analysis showing that both K385R and K500R mutant UHRF1 proteins were resistant to SET8-induced downregulation. The above stable cell lines were transfected with or without SET8 and the effect on UHRF1 protein was assayed by Western Blot analysis. **c)** IP-Western blot analysis for the interaction between ectopically expressed SET8 and UHRF1 or UHRF1 mutants as indicated.

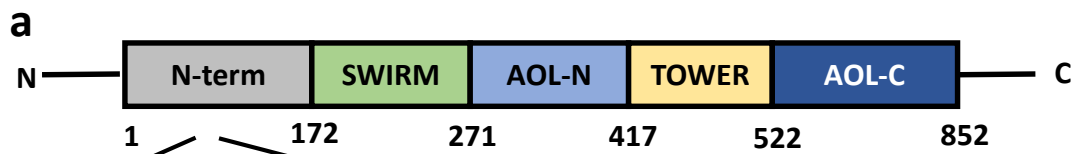

**Exon1:**

```

atgttatctgggaagaaggcggcagccgcggcggcgggcggctg
cagcggcagcaaccgggacggaggctggccctgggacagcag
ggcggctccgagaacgggtctgaggtggccgcgcagcccgcggg
cctgtcgggccagccgaggtcgggcccggggcggtggggggag
cgcacaccccgaagaaagacctccggggctcgcccccg
ggggcctggcggaaccgcccgggtccgcagggcctcaggccgg
ccctactgtctgcctgggtctgcgacccccatgaaactggaat
agcagagactccggaaggggcgtcggaccagccggcgcaagcg
ggcgaaggtagagtacagagagatggatgaaagcttgccaac
ctctcagaagatgagtattattcagaagaagagagaatgccaa
aagcagagaaggaaaagaagctccccaccaccccctcaagc
cccacctgaggaagaaaatgaaagt
  
```

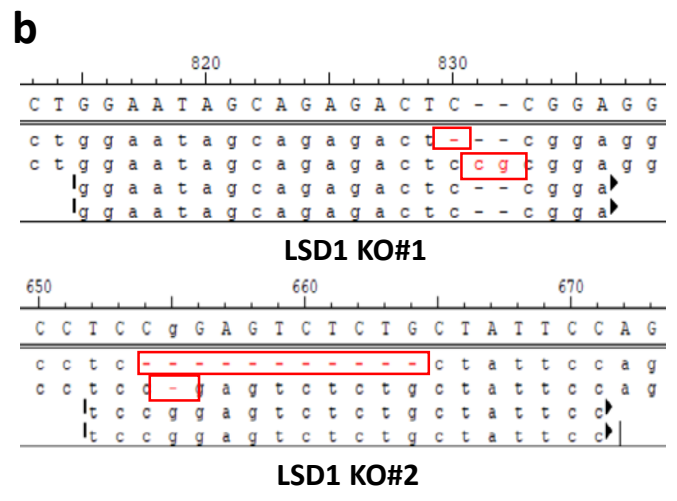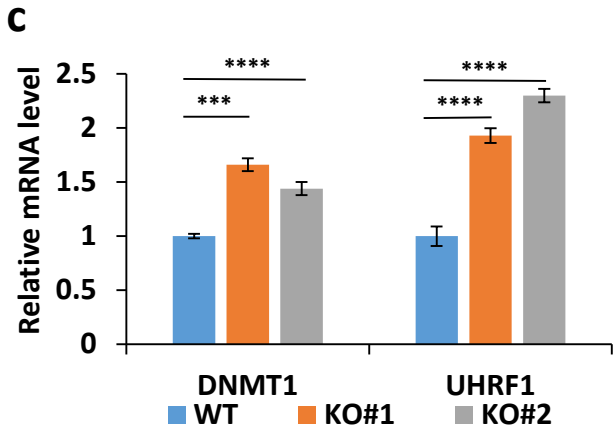

**Supplementary Figure S4. Knockout of LSD1 by CRISPR-Cas9.** a) sgRNA was designed at the first exon of LSD1. b) Sequencing results of TA clones of the two LSD1 knockout HeLa cells. c) qRT-PCR analysis showing that knockout of LSD1 by the CRISPR-Cas9 system resulted in increased transcription levels of UHRF1 and DNMT1 in LSD1-knockout HeLa cells.\*\*\*,P<0.001 ;\*\*\*\*,P<0.0001 .

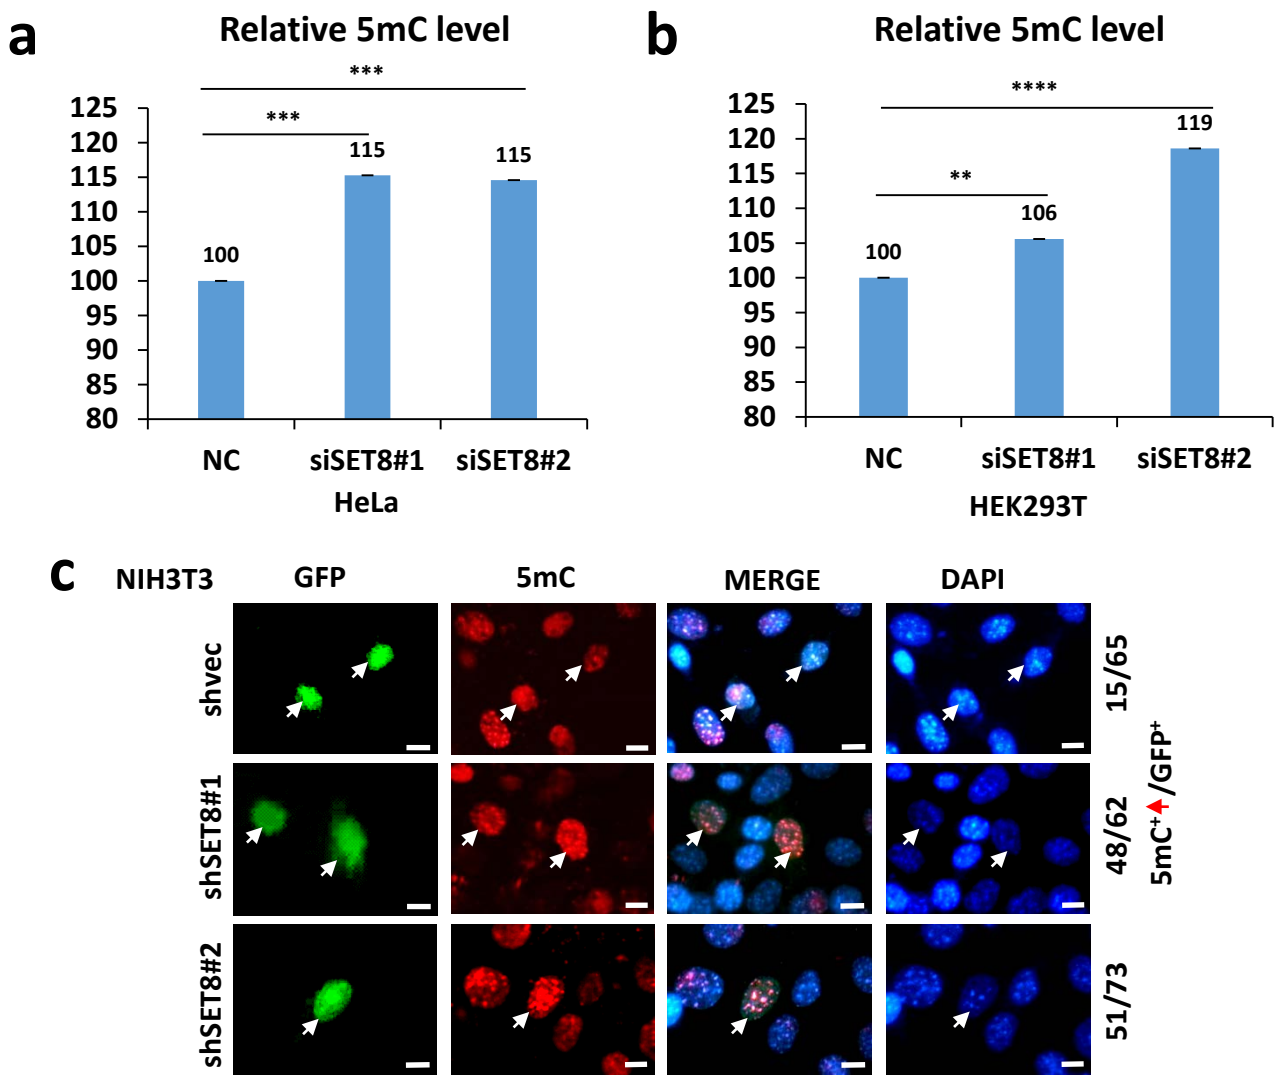

**Supplementary Figure S5. SET8 has a role in suppressing of global DNA methylation.** a) LC-MS analysis showing that knockdown of SET8 by transient transfection of SET8-specific siRNAs resulted in elevated levels of DNA methylation in HeLa cells. **\*\*\***,  $P < 0.001$ . b) LC-MS analysis showing that knockdown of SET8 by transient transfection of SET8-specific siRNAs resulted in elevated levels of DNA methylation in HEK293T cells. **\*\***,  $P < 0.01$ ; **\*\*\*\***,  $P < 0.0001$ . c) Immunostaining showing that knockdown of SET8 by transient transfection of SET8-specific shRNAs (green) led to increased DNA methylation (red) in NIH3T3 cells. Scale bar, 20  $\mu\text{m}$ .

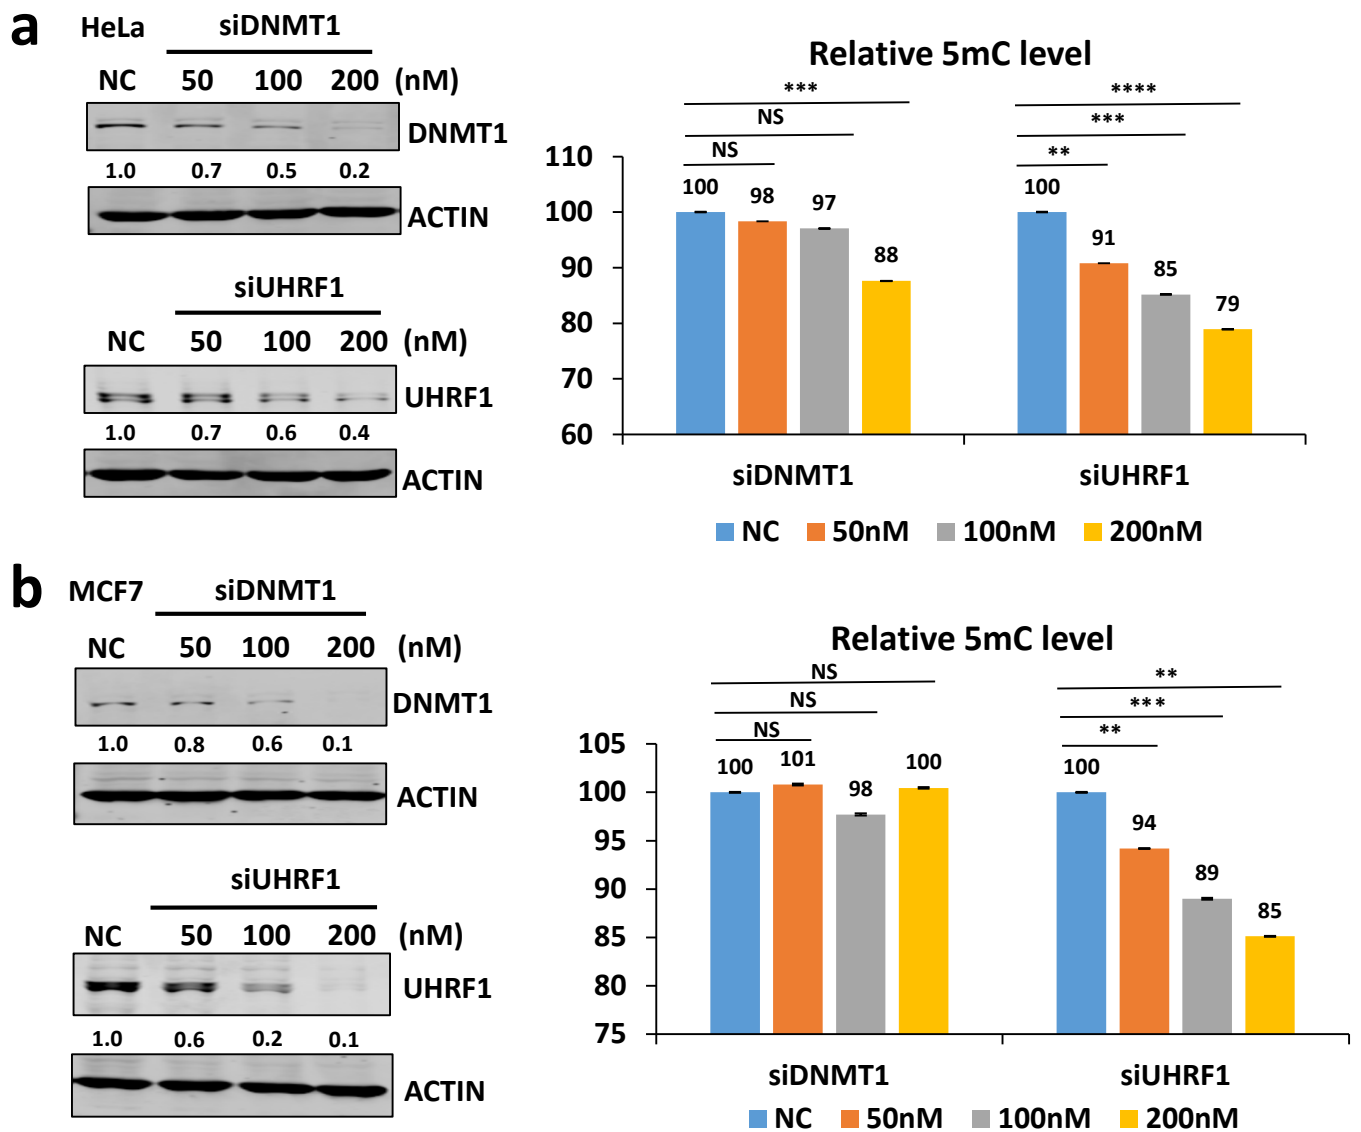

**Supplementary Figure S6. DNA methylation is more sensitive to reduction of UHRF1 than DNMT1.** a) Increased knockdown of DNMT1 and UHRF1 in HeLa cells was associated with a progressively reduced level of DNA methylation. \*\*,  $P < 0.01$ ; \*\*\*,  $P < 0.001$ . b) Increased knockdown of DNMT1 and UHRF1 in MCF7 cells was associated with a progressively reduced level of DNA methylation. \*\*,  $P < 0.01$ ; \*\*\*,  $P < 0.001$ .

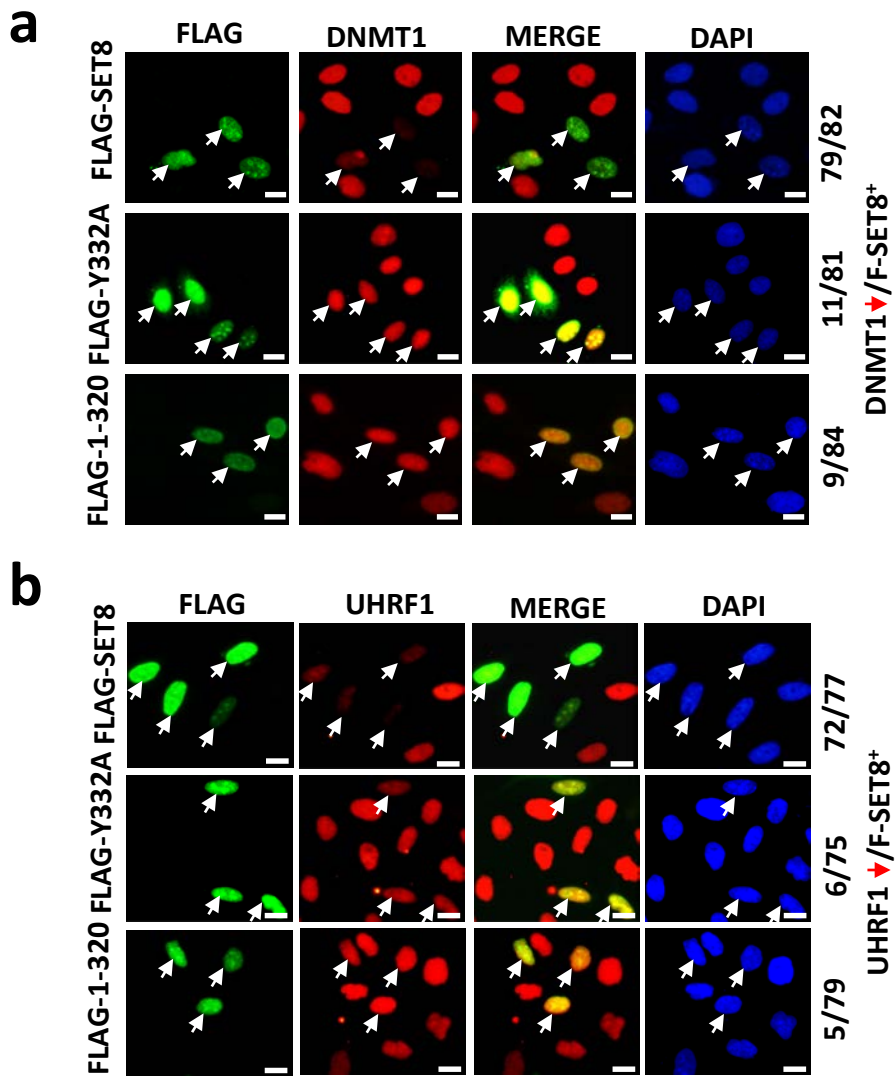

**Supplementary Figure S7. SET8 activity regulates the stability of UHRF1 and DNMT1 independent of DNMT3A/3B.** a) Immunostaining showing that overexpression of a FLAG-tagged SET8 (green) in DNMT3A/3B DKO cells diminished the level of endogenous DNMT1 (red) proteins. But the mutants Y332A (green) and 1-320 (green) could not. Scale bar, 20  $\mu$ m. b) Immunostaining showing that overexpression of a FLAG-tagged SET8 (green) in DNMT3A/3B DKO cells diminished the level of endogenous UHRF1 (red) proteins. But the mutants Y332A (green) and 1-320 (green) could not. Scale bar, 20  $\mu$ m.

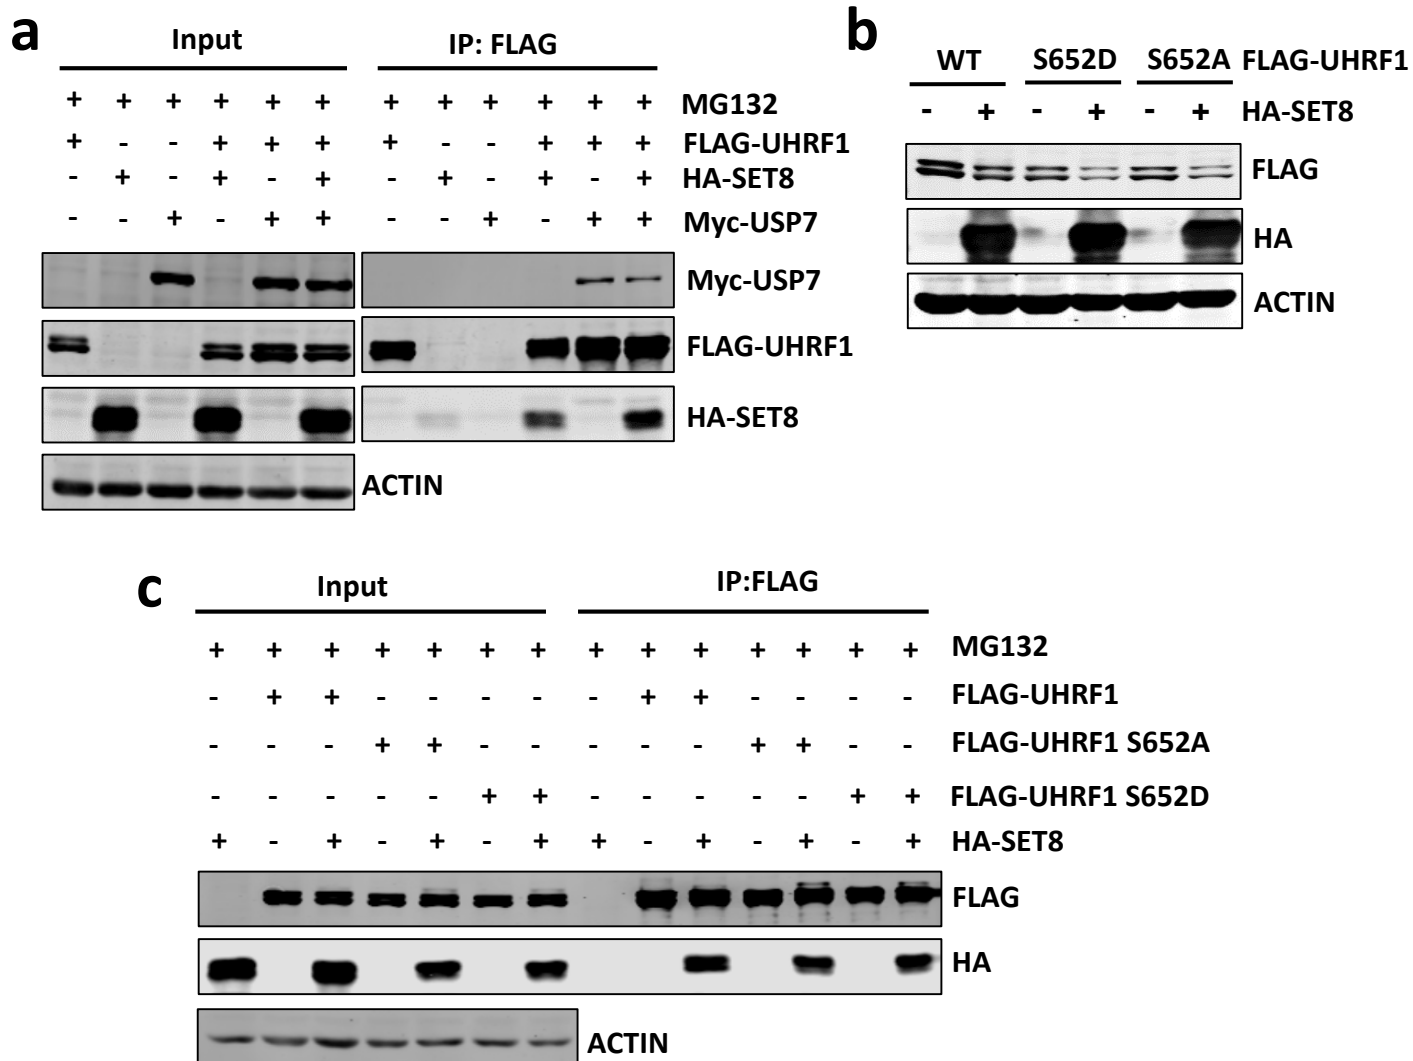

**Supplementary Figure S8. SET8 regulates UHRF1 stability independent of USP7 and S652 phosphorylation.** a) IP-Western blot analysis showing that SET8 did not compete with USP7 for binding of UHRF1. b) Western blot analysis showing that ectopic overexpression of SET8 down-regulated wild-type and S652A and S652D mutants of UHRF1. HeLa cells stably expressing FLAG-UHRF1 or S652A or S652D UHRF1 mutant were established first and then transfected with a SET8-expressing plasmid. c) IP-Western blot analysis showing that S652A or S652D mutation did not affect the interaction between ectopically expressed SET8 and UHRF1.
